# Supplementary material
Source: PubMed Central journal article supplement (PMC10011932)
Supplement: jamaneurol-e225250-s002.pdf [file jamaneurol-e225250-s002.pdf]

## **Data Sharing Statement**

### **Data**

**Data available:** No

### **Additional Information**

**Explanation for why data not available:** Written requests for access to the data reported in this paper will be considered by the corresponding author and the Scientific Board of the Swiss MS Cohort Study and a decision made about the appropriateness of the use of the data. If the use is appropriate, a data sharing agreement will be put in place before a fully de-identified version of the dataset used for the analysis with individual participant data is made available.
